# Supplementary material
Source: Springer Nature journal article supplement (https://www.springermedizin.de/resource/supplementary/13075_2012_4013_MOESM12_ESM.pdf/9695840)

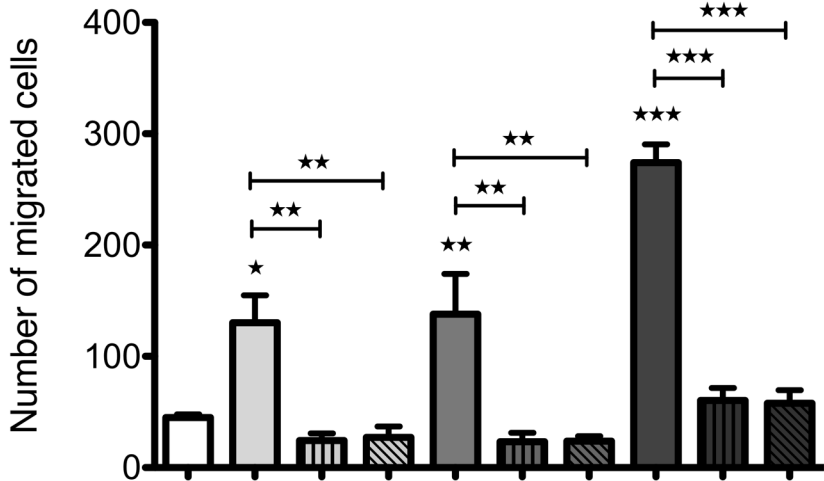

|           |   |   |   |   |   |   |   |   |   |   |
|-----------|---|---|---|---|---|---|---|---|---|---|
| PDGF      | - | + | + | + | - | - | - | - | - | - |
| IGF       | - | - | - | - | + | + | + | - | - | - |
| SN trauma | - | - | - | - | - | - | - | + | + | + |
| IL-1β     | - | - | + | - | - | + | - | - | + | - |
| TNF-α     | - | - | - | + | - | - | + | - | - | + |

Supplement: MOESM12 [file 9695840]
